# Supplementary material for: Long-term variations in actual evapotranspiration over the Tibetan Plateau
Source: Copernicus journal article supplement (doi:10.5194/essd-13-3513-2021), 2021-07-19

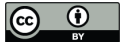

*Supplement of*

## **Long-term variations in actual evapotranspiration over the Tibetan Plateau**

**Cunbo Han et al.**

*Correspondence to:* Y. Ma ([yyma@itpcas.ac.cn](mailto:yyma@itpcas.ac.cn))

The copyright of individual parts of the supplement might differ from the article licence.

**Figure S1.** Monthly averaged meteorological variables between in situ measurements and CMFD at QOMS station: air temperature ( $T_a$ ), specific humidity ( $q_a$ ), wind velocity ( $U$ ), downward shortwave radiation (SWD), and downward longwave radiation (LWD). RMSE is the root-mean-square error, MB is the mean bias, and R is the correlation coefficient.

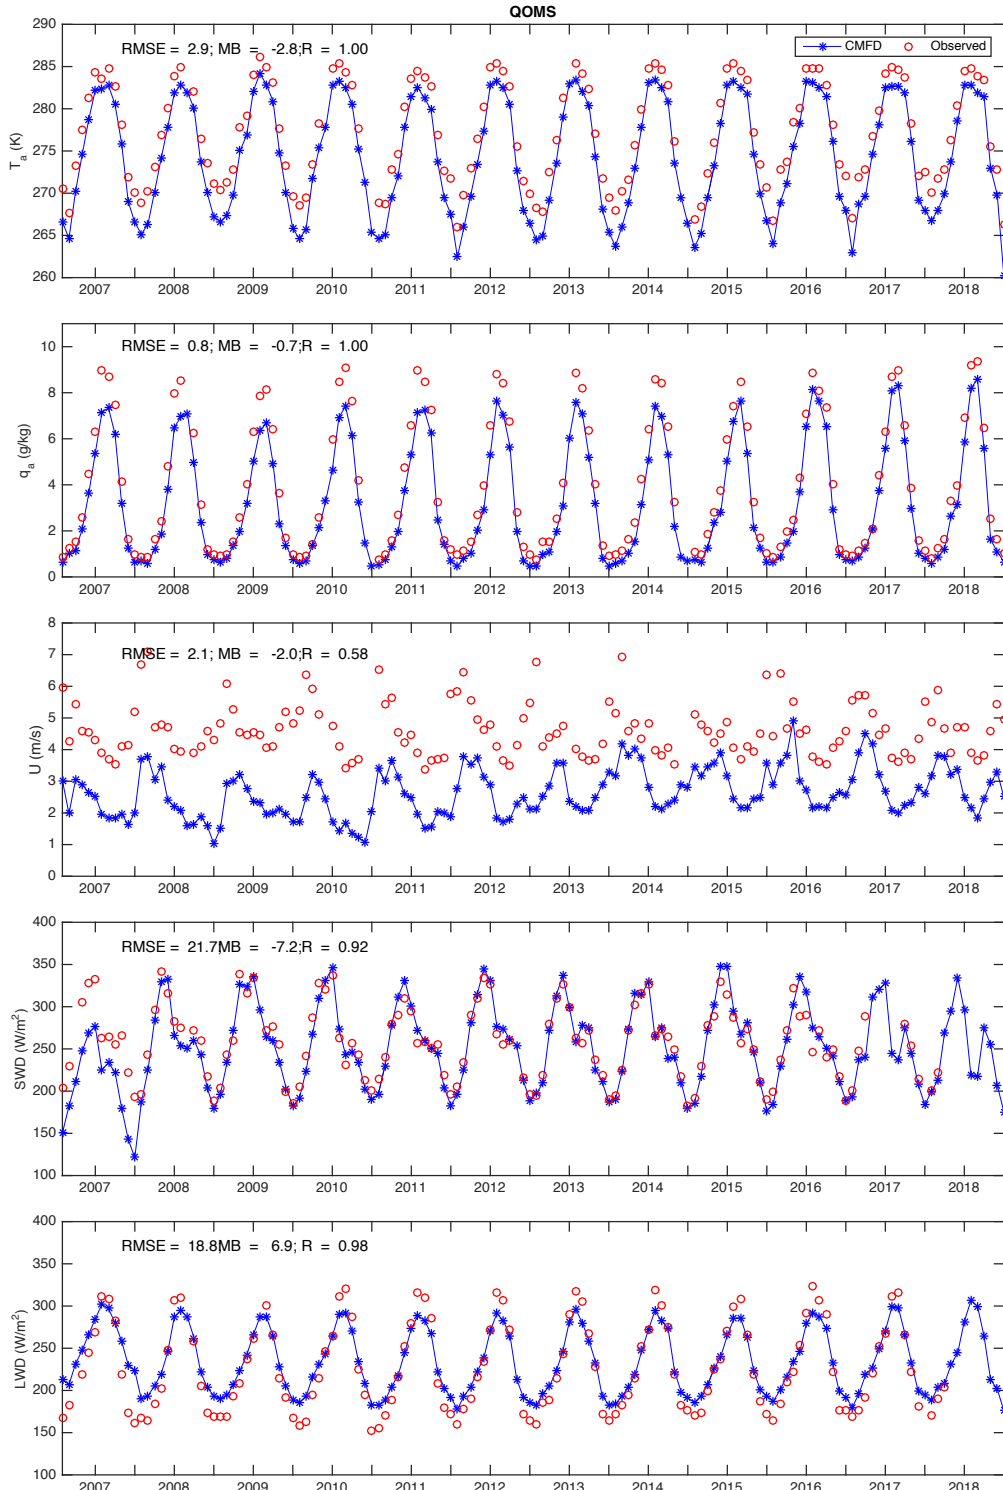

Figure S2: The same as Fig.S1 but at NAMORS station.

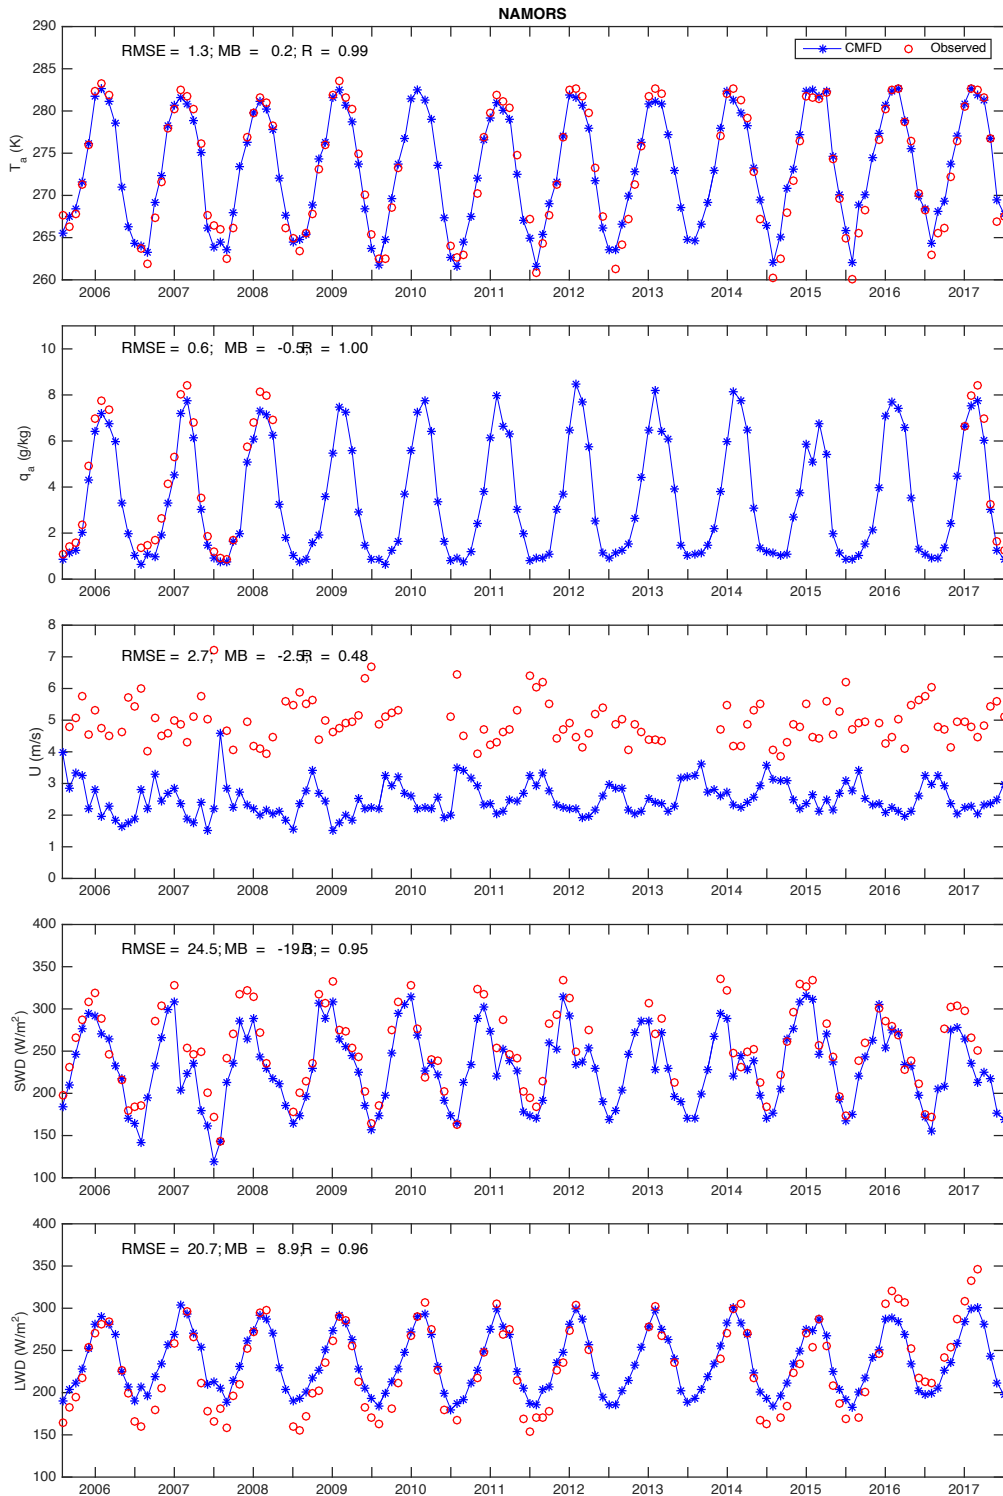

Figure S3: The same as Fig.S1 but at SETORS station.

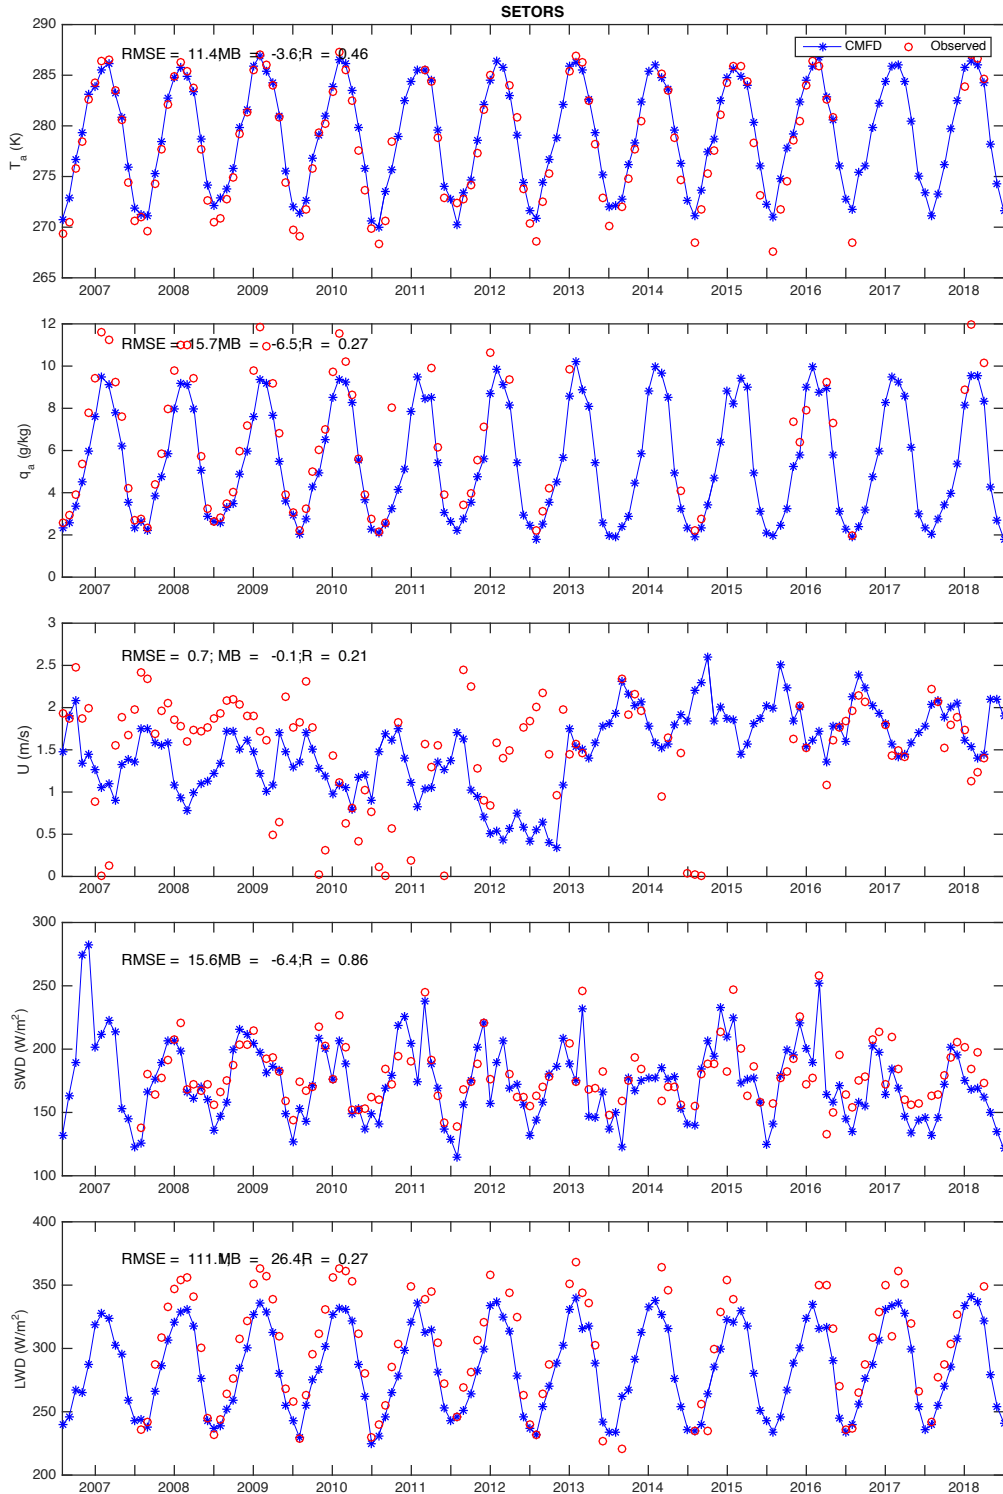

**Figure S4:** The same as Fig.S1 but at NADORS station.

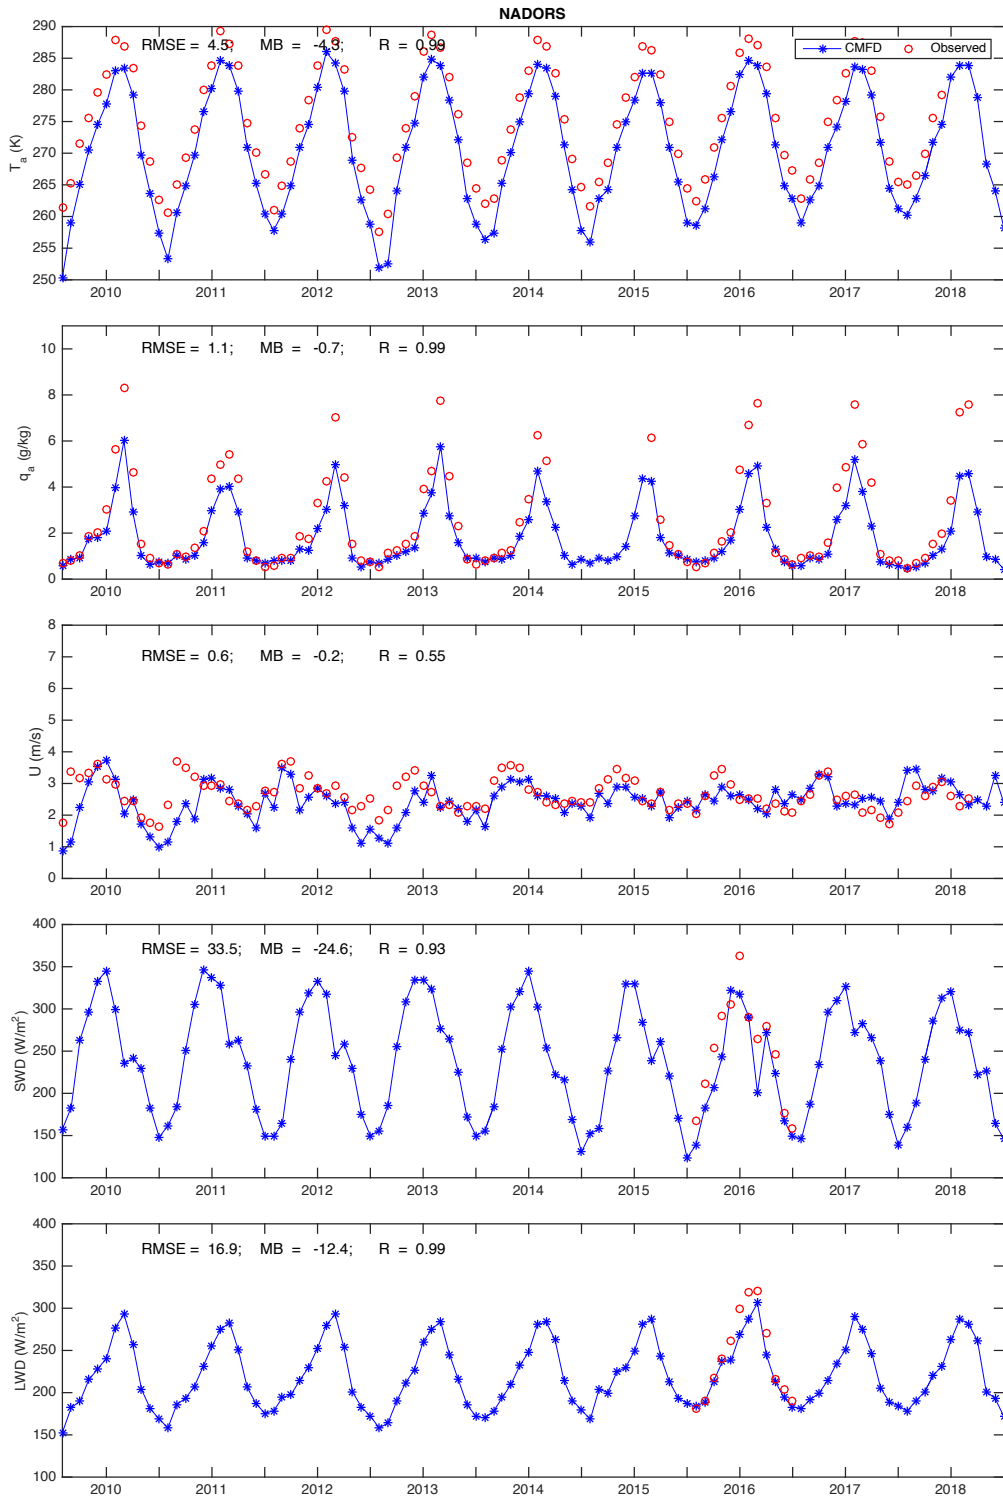

Figure S5: The same as Fig.S1 but at MAWORS station.

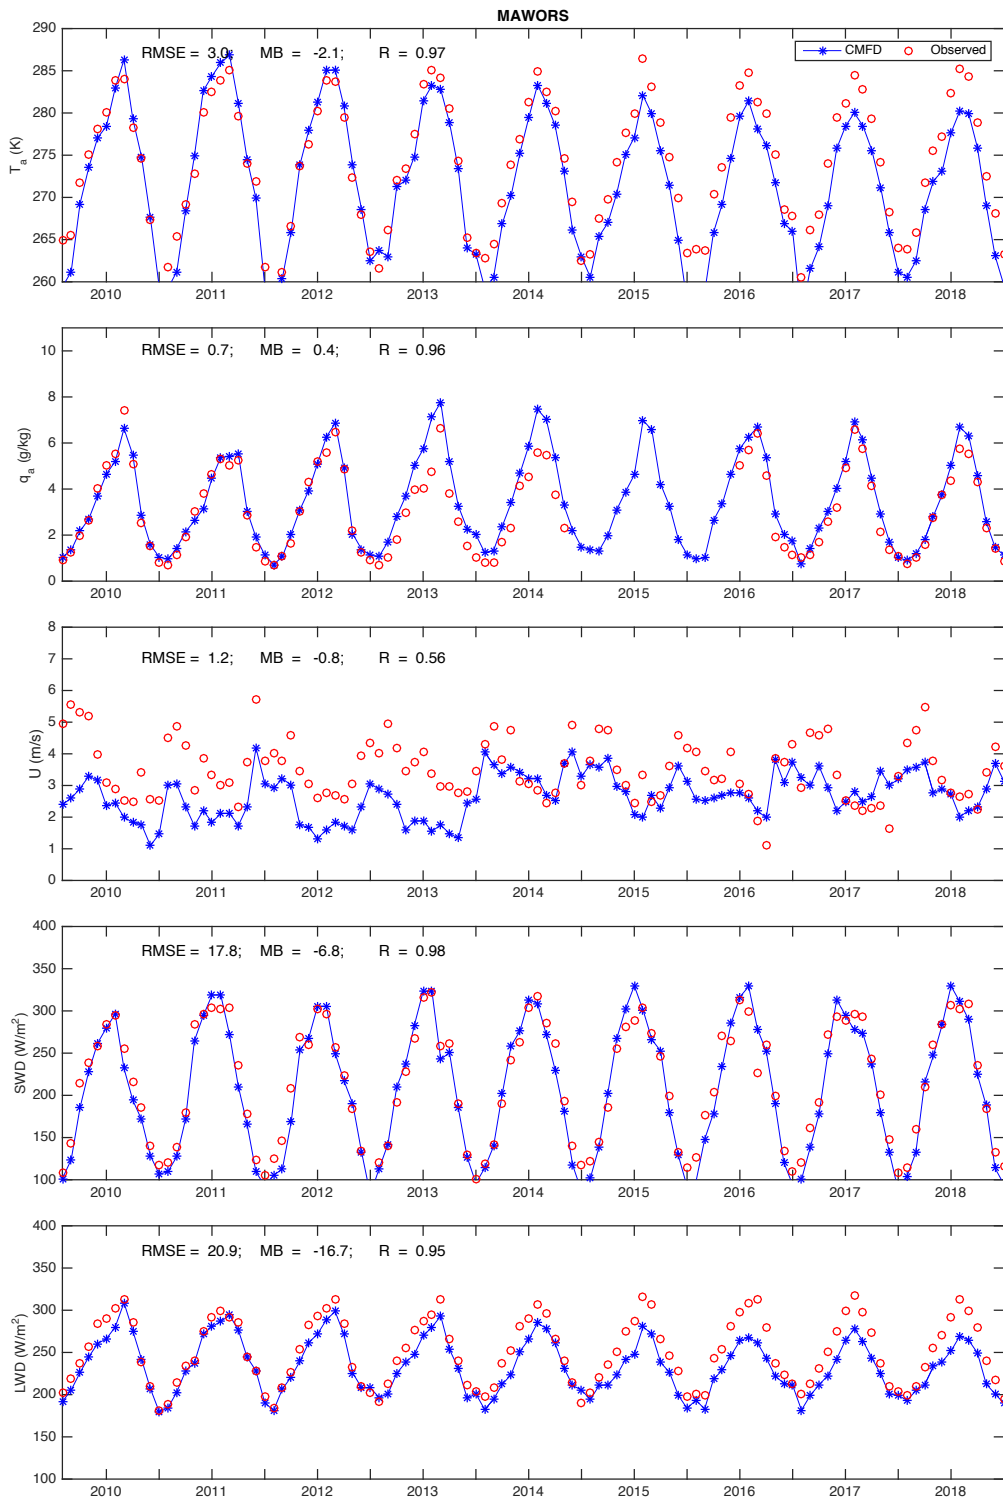

Figure S6: The same as Fig.S1 but at BJ station.

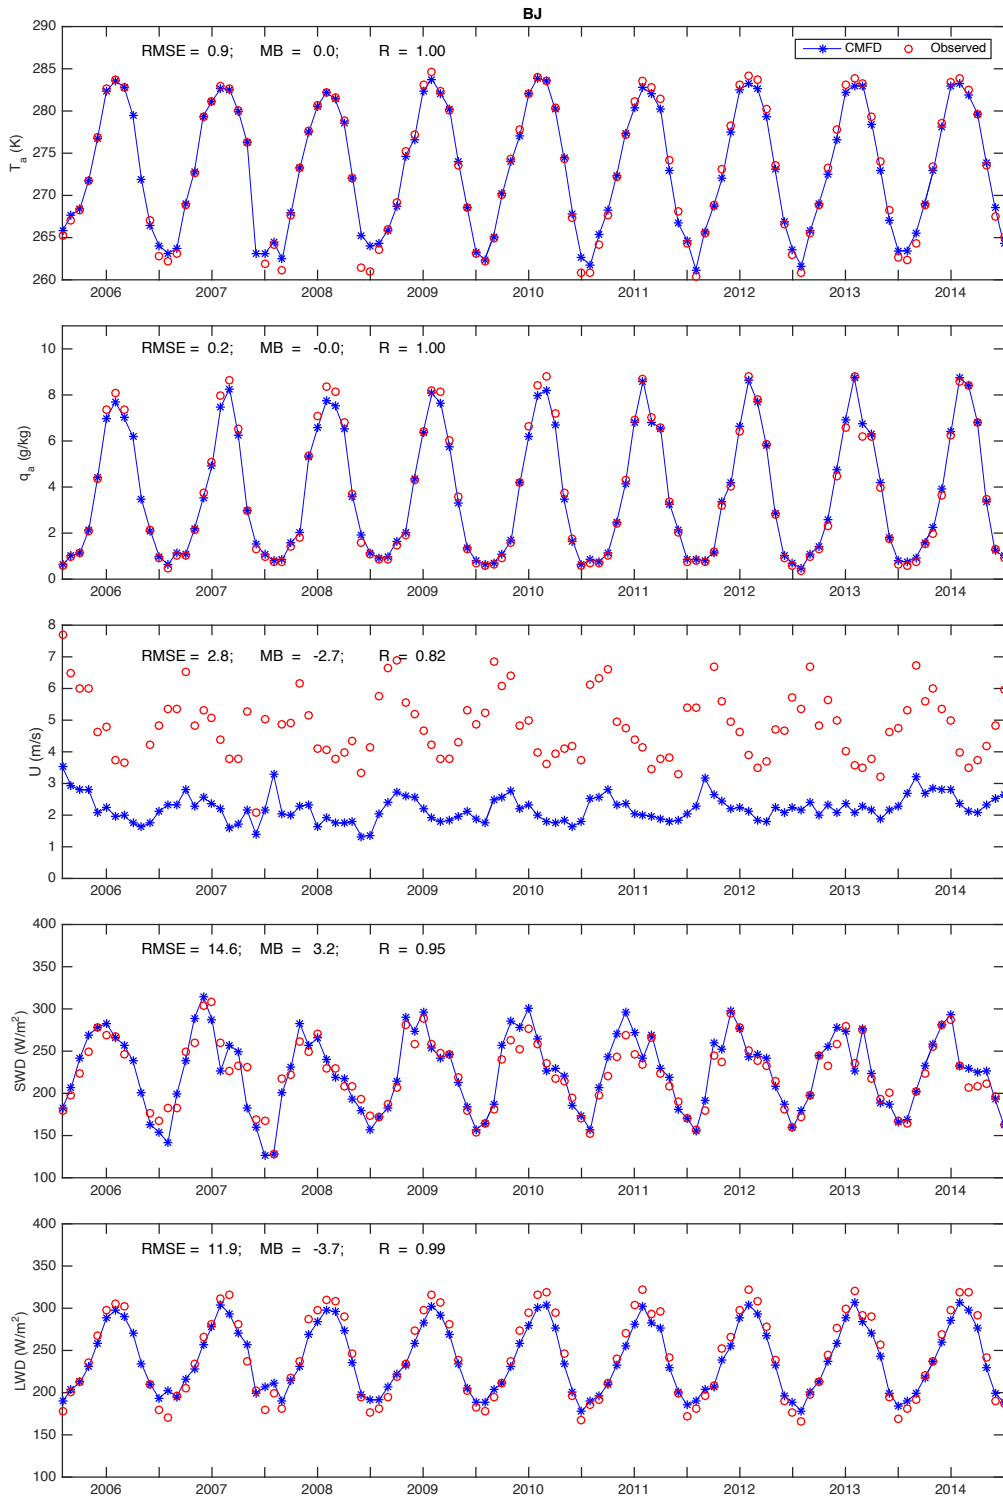

Supplement: Supplementary file [file essd-13-3513-2021-supplement.pdf]
